# Supplementary material for: Sex Differences in COVID-19 Hospitalization and Hospital Mortality among Patients with COPD in Spain: A Retrospective Cohort Study
Source: MDPI journal article supplement (doi:10.3390/v14061238), 2022-06-07
Supplement: s1 [file s1]

**Table S1.** ICD-10 codes for diagnosis and therapeutic procedures used in this investigation.

| Description                                | ICD-10 codes                                     |
|--------------------------------------------|--------------------------------------------------|
| COVID 19                                   | B34.2                                            |
|                                            | B97.29                                           |
|                                            | U07.1                                            |
| Chronic Obstructive Pulmonary Disease      | J44.0, J44.1 and J44.9                           |
| Pneumonia                                  | J12.82, J12.89, J12.9                            |
| Acute bronchitis                           | J20.8, J20.9                                     |
| Lower respiratory infection                | J22, J98.8                                       |
| Acute respiratory distress syndrome (ARDS) | J80                                              |
| Sepsis                                     | R65.20, R65.21                                   |
| Obesity                                    | E66.09, E66.1, E66.2, E66.01, E66.3, E66.8 E66.9 |
| Bronchiectasis                             | J47                                              |
| Asthma                                     | J45                                              |
| Pulmonary embolism                         | I26.xx                                           |
| Oxygen prior to admission                  | Z99.81                                           |
| Long term (current) use of steroids.       | Z79.5                                            |
| Non-invasive mechanical ventilation        | 5A09357, 5A09457, 5A09557                        |
| Invasive mechanical ventilation            | 5A1945Z, 5A1955Z, 5A1935Z                        |

\*Each discharge diagnosis has a "Present on Admission (POA)" indicator assigned according to the ICD-10-CM Official Guidelines for Coding and Reporting (<https://icdlist.com/icd-10/guidelines/>). The reporting options and definitions for POA are "Y" (present at admission); "N" (not present at admission); "U" (lack documentation to determine presence at admission); "W" (provider is unable to clinically determine if the condition was present); and unreported/not used. Only COPD patients with "Y" were included in the study population.

The ICD 10 codes for conditions included in the Charlson Comorbidity Index can be found in references:

Sundararajan V, Henderson T, Perry C, Muggivan A, Quan H, Ghali WA. New ICD-10 version of the Charlson comorbidity index predicted in-hospital mortality. J. Clin. Epidemiol 2004;57:1288–94. doi: 10.1016/j.jclinepi.2004.03.012.

Quan H, Sundararajan V, Halfon P, Fong A, Burnand B, Luthi JC, et al. Coding algorithms for defining comorbidities in ICD-9-CM and ICD-10 administrative data. Med Care. 2005;43:1130-9. doi: 10.1097/01.mlr.0000182534.19832.83.
